# Supplementary material for: Spontaneous disproportionation of rhodium(i) bisoxazolinates to rhodium(ii)Electronic supplementary information (ESI) available: synthetic procedures (including 1H NMR, 13C NMR and elemental analysis data), EPR spectrum and cyclic voltammogram. See http://www.rsc.org/suppdata/cc/b1/b110183h/
Source: Royal Society of Chemistry journal article supplement (doi:10.1039/b110183h), 2002-01-11
Supplement: b110183h.doc [file b110183h.doc]

# Supplementary Material

***General remarks***

All manipulations were carried out in an argon atmosphere under standard Schlenck conditions. All solvents (including the deuterosolvents) were distilled from Na/Benzophenone prior to use. 2,2'-Methylenebis{(4*S*)-4-*tert*-butyl-2-oxazoline} (*t*‑Bu2‑box) was used as purchased (Aldrich) whereas 2,2'-methylenebis{(4*S*)-4-phenyl-2-oxazoline} (Ph2‑box) was prepared starting from phenylalanine following literature procedures for the reduction to the aminoalcohol,1 the conversion to a bis(hydroxyalkylamide) with diethylmalonate,2 and the subsequent ring closure.3

***[{2,2'-Methylenebis[(4*S*)-4-phenyl-2-oxazolin]-ato}-bis(2-ethene)-rhodium(i)] (1)***

To a solution of [(Ph2-boxate)lithium] (prepared in situ by reacting 1.20 g Ph2-box(3.92 mmole) with an equimolar amount of freshly prepared lithium diisopropylamine) in THF (15 mL) was added a suspension of [di-**-chlorotetrakis(**2-ethene)dirhodium(i)] (0.76 g, 1.96 mmole) in THF (15 mL). After having stirred the mixture for 2 hours at room temperature the solvent was removed *in vacuo* and the remaining solids were redissolved in benzene. The benzene solution was filtered to remove the lithiumchloride generated during the reaction. After removing the benzene *in vacuo*, a yellow powder remained (1.4 g (78%)). Crystals suitable for X-ray analysis were obtained by diffusion of hexane into an ether solution at –30 oC.

Elemental analysis calcd. (%) for C23H25N2O2Rh (464.37): C 59.49, H 5.43, N 6.03; found: C 59.19, H 5.41, N 6.00%; 1H NMR (200.13 MHz, 25 ºC, C6D6): ** (ppm) = 7.30-7.11 (m, 10H, phenyl *o*, *m*, *p*), 5.36 (s, 1H, ((NC)2C*H*)), 4.62 (d, 2H, C*H*aHb), 3.92-3.80 (m, 4H, CHa*H*b and Ph-C*H*), 3.64 (m, 4H, ethene *H*aC=C*H*b), 2.89 (m, 2H, ethene C=C*H*c), 0.91 (m, 2H, ethene C=C*H*c); 13C {1H} NMR (50.32 MHz, 25 ºC, C6D6):172.5 (N-*C*-O), 146.5 (phenyl *i*), 129.6, 129.0, and 126.5 (phenyl *o*, *m*, *p*), 75.0 (*C*H2), 65.6 (d, *J*RhC = 11.8 Hz, ethene *C*a), 64.6 (Ph-*C*H), 59.9 ((NC)2*C*H), 55.5 (d, *J*RhC = 10.8 Hz, ethene *C*b)

***[{2,2'-Methylenebis[(4*S*)-4-*tert*-butyl-2-oxazolin]-ato}-bis(2-ethene)-rhodium(i)] (2)***

[Di-**-chlorotetrakis(**2-ethene)dirhodium(i)] (0.21 g, 0.54 mmole) was suspended in THF (5-10 mL) and [(*t*‑Bu2‑boxate)lithium(THF)] (0.27 g, 1.08 mmole, 2 eq.) was dissolved in THF and cooled to –78 oC. The cooled solution of the lithium salt was added to the cooled suspension and the mixture was allowed to warm to room temperature while stirring vigorously. After 30 minutes the solvent was removed *in vacuo* a sample was taken from the resulting solids and dissolved in deuterated THF for NMR analysis (See NMR data below). Upon standing in deuterated THF at –20 oC for two months the brown solution gradually turned purple and the NMR spectra showed gradual decomposition of the complex. Some metallic rhodium appeared on the NMR tube wall and the generation of free ethene was observed in NMR. After two months purple crystals were obtained from the solution which by X-ray were identified as compound **3**.

1H NMR (400.13 MHz, 25 ºC, [D8]THF): ** (ppm) = 4.35 (s, 1H, (NC)2C*H*), 4.33 (d, *J* = 8.5 Hz, 2H, C*H*aHb), 3.80 (dd, *J*1 = 8.5 Hz, *J*2 = 6.3 Hz, 2H, *t*-bu-C*H*), 3.52 (t or dd broad, 2H, ethene C=C*H*a), 3.44 (t or dd broad, 2H, ethene C=C*H*b), 3.39 (d, *J* = 6.3 Hz, 2H, CHa*H*b), 2.58 (t or dd broad, 2H, ethene C=C*H*c), 1.05 (s, 18H, *t*-BuC*H*3), 0.49 (t or dd broad, 2H, ethene C=C*H*d); 13C {1H} NMR (100.62 MHz, 25 ºC, [D8]THF): 172.0 (N-*C*-O), 69.5 ((NC)2*C*H), 69.0 (*C*H2), 60.8 (d, *J*RhC = 13.8 Hz, ethene *C*a), 60.0 (s, *t*-Bu-*C*H), 50.9 (d, *J*RhC = 11.6 Hz, ethene *C*b), 36.6 (s, *C*Me3), 27.2 (s, C*Me*3).

***[Bis{2,2'-methylenebis[(4*S*)-4-*tert*-butyl-2-oxazolin]-ato}rhodium(ii)] (3)***

[Di-**-chlorotetrakis(**2-ethene)dirhodium(i)] (0.25 g, 0.64 mmole) was suspended in THF (5-10 mL) and [(*t*‑Bu2‑boxate)lithium(THF)] (0.32 g, 1.28 mmole, 2 eq.) was dissolved in THF and cooled to –78 oC. The cooled solution of the lithium salt was added to the cooled suspension and the mixture was allowed to warm to room temperature while stirring vigorously. After 15 minutes the solution was warmed up to 60 oC and kept at this temperature for 16 hours. After the mixture had cooled down to room temperature it was filtered over celite and the filtrate was concentrated to half its volume. After a night at –20 oC a crop of small dark purple crystals had formed (219 mg (53%)). Crystals suitable for X-ray analysis were obtained from an NMR sample of **2** in deuterated THF after standing at –20 oC for two months. The metallic rhodium which is formed during the disproportionation was isolated for analysis by centrifugation instead of filtration in the above procedure and subsequent washing with THF (Yield >90%).

Elemental analysis calcd. (%) for C30H50N4O4Rh (633.5): C 56.87, H 7.95, N 8.84; found: C 56.94, H 8.11, N 9.00%; 1H NMR (relatively large broad peaks appeared in the spectrum of **2** after a month, the NMR data for **3** are taken from the mixture with **2** and some decomposition products) (400.13 MHz, 25 ºC, [D8]THF): ** (ppm) = 17.2 (broad, approx. 4H), 3.9 (broad, approx. 10 H), ‑0.12 (very broad, approx. 36H). Spectrum at –90 oC (500 MHz, [D8]THF): ** (ppm) = 26.0 ppm (broad, approx. 6H), 11.4 (broad, approx. 30H), ‑6.1 (very broad, approx. 14 H).

Elemental analysis found for metallic rhodium: 89.9 (±1) %.

EPR spectrum (experimental and simulated) of **3** taken ina frozen solution of acetone/methanol (2:3) at 20K, g-Values are: g1 = 1.947, g2 = 2.016, g3 = 2.794.

Cyclic voltammogram of **3**. Conditions are as follows: 0.10 M N(*n*-bu)4PF6 supporting electrolyte in acetonitrile, Pt electrode, room temperature, scan rate 50 mVs-1.

**References:**

1 D.A. Evans, G.S. Peterson, J.S. Johnson, D.M. Barnes, K.R. Campos, K.A. Woerpel, *J. Org., Chem.* 1998, **63**, 4541-4544.

2 I. Butula, G. Karlovic, *Liebigs Ann. Chem.* 1976, 145.

3 R.E. Lowenthal, A. Abiko, S. Masamune, *Tetrahedron Lett.* 1990, *31*(**42**), 6005-6008.
